# Supplementary material
Source: ML conference proceedings conference paper supplement (https://openreview.net/forum?id=J64lDCrYGi)
Supplement: supplementary_material [file attachment]

---

# Referring Transformer: A One-step Approach to Multi-task Visual Grounding

## Supplementary Material

---

Muchen Li<sup>1,2</sup>                      Leonid Sigal<sup>1,2,3,4</sup>  
muchenzi@cs.ubc.ca              lsigal@cs.ubc.ca

<sup>1</sup>Department of Computer Science, University of British Columbia  
<sup>2</sup>Vector Institute for AI    <sup>3</sup>CIFAR AI Chair    <sup>4</sup>NSERC CRC Chair

### 1 More Details for Referring Expression Segmentation (RES)

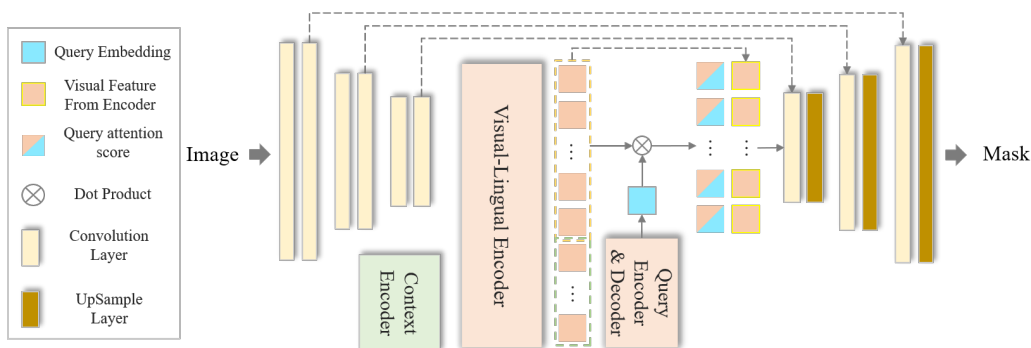

Figure 1: **RES Task Head.** A detailed illustration of our model for RES task.

We provide a more detailed illustration of our model for the RES task in Figure 1. With decoded query embedding from the query decoder and visual feature coming from visual-lingual decoder, a query attention score  $S_{att} \in \mathbb{R}^{M \times (HW)}$  is computed using a dot product. Here  $M$  denotes the number of attention heads, which is 8 in our implementation. The attention score is then concatenated with visual feature and sent into several up-sampling blocks (convolution layer with stride of 2). We also add residual connections from different stages of the ResNet backbone to help refine the up-sampled features. All convolution layers here use a kernel size of 3. The design is motivated by Mask R-CNN [3] and DETR [1].

### 2 Additional Implementation Details

**Pretraining.** We use the description split of Visual Genome [6] for pretraining, it contains 100k images with an average of 40 region descriptions per-image. We pretrain our model with REC task on the Visual Genome dataset for 6 epochs. We set the learning rate at  $1e-4$  and decay it by 10x after 4 epochs. The trained model is then used to initialize the model for dataset-specific fine-tuning.

**ReferItGame / Flickr30k Training.** On ReferItGame [5] and Flickr30k Entities [10], our model is trained for 90 and 60 epochs respectively, with learning rate decays on the 60th and 40th epoch. Following [1], we also use auxiliary loss to aid the training process.

**RefCOCO Training.** For experiments on RefCOCO(+g) [9, 11], since auxiliary loss is expensive for RES task, we first train our model with auxiliary loss on REC task for 60 epochs using a learning

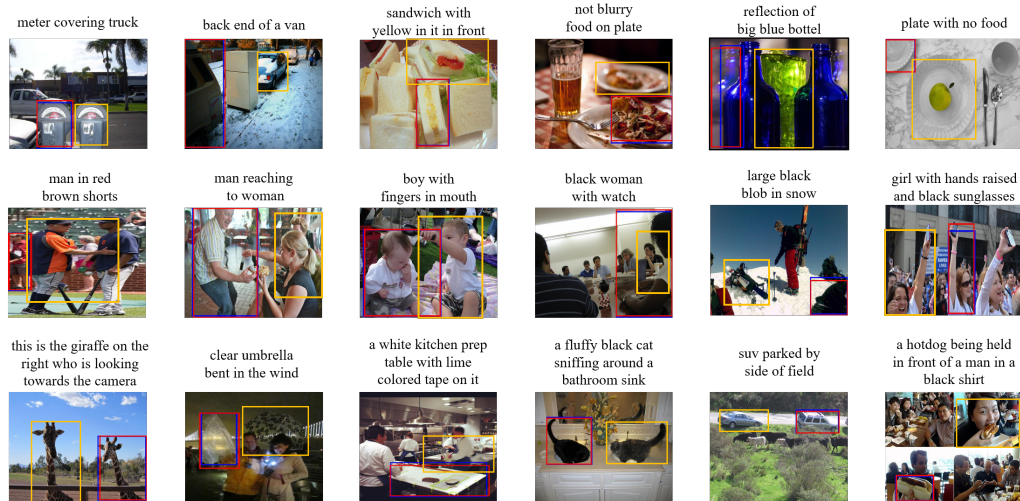

Figure 2: **Additional Qualitative Results on REC Task.** Orange, blue and red bounding boxes correspond to outputs from MCN [8], our model and the ground truth. The first row, second row and third row comes from RefCOCO+ testA, testB and RefCOCOg test set respectively.

rate of  $1e-4$ . Then, we disable auxiliary loss and train the model jointly on RES and REC task for 30 epochs with learning rate of  $1e-4$  that decays on the 10th epoch.

### 3 Additional Results

**More Qualitative Comparison.** Additional qualitative results on REC and RES tasks, compared to the previous multi-task framework of [8], are shown in Figure 2 and Figure 3 respectively. Note that the score of RES can benefit greatly from better localization of corresponding REC task. In Figure 3, to better compare the quality of generated referred masks, we compare the mask quality in the case where both MCN [8] and our method assuming correct REC localization.

**Ablation on Losses.** We also conduct an ablation on the loss components. We can see that  $L1$  loss is very important for REC tasks and Dice loss is most significant for RES. The gIoU and Focal loss terms also improve the performance, but by a much more modest margin. We further apply the Consistency Energy Minimization (CEM) proposed in MCN [8] to our model and observe consistent performance drop on RES task in Table 1. This shows that explicit constraint on multiple tasks will tend to degrade our model’s performance.

Table 1: Ablations study on losses.

| Methods              | RefCOCO REC  |              |              |
|----------------------|--------------|--------------|--------------|
|                      | val          | testA        | testB        |
| RefTR                | <b>81.82</b> | <b>85.33</b> | <b>76.31</b> |
| RefTR - $L1$ loss    | 17.45        | 19.35        | 16.13        |
| RefTR - gIoU loss    | 79.08        | 82.95        | 73.39        |
| RefTR + CEM loss [8] | 81.47        | 84.96        | 76.80        |
| Methods              | RefCOCO RES  |              |              |
|                      | val          | testA        | testB        |
| RefTR                | <b>69.94</b> | <b>72.80</b> | <b>66.13</b> |
| RefTR - Focal loss   | 69.06        | 72.57        | 65.78        |
| RefTR - Dice loss    | 64.04        | 67.09        | 60.03        |
| RefTR + CEM loss [8] | 69.17        | 72.17        | 65.33        |

**Results with Different Language Backbone.** We also looked into the effect of different language backbone by replacing the BERT [2] model used in our model to RoBERTa [7] (also used by MDETR [4]). As we can see from Table 2, using RoBERTa gives us performance boost on most of the datasets. This shows that our model is scaleable and could potentially be benefited by larger backbone.

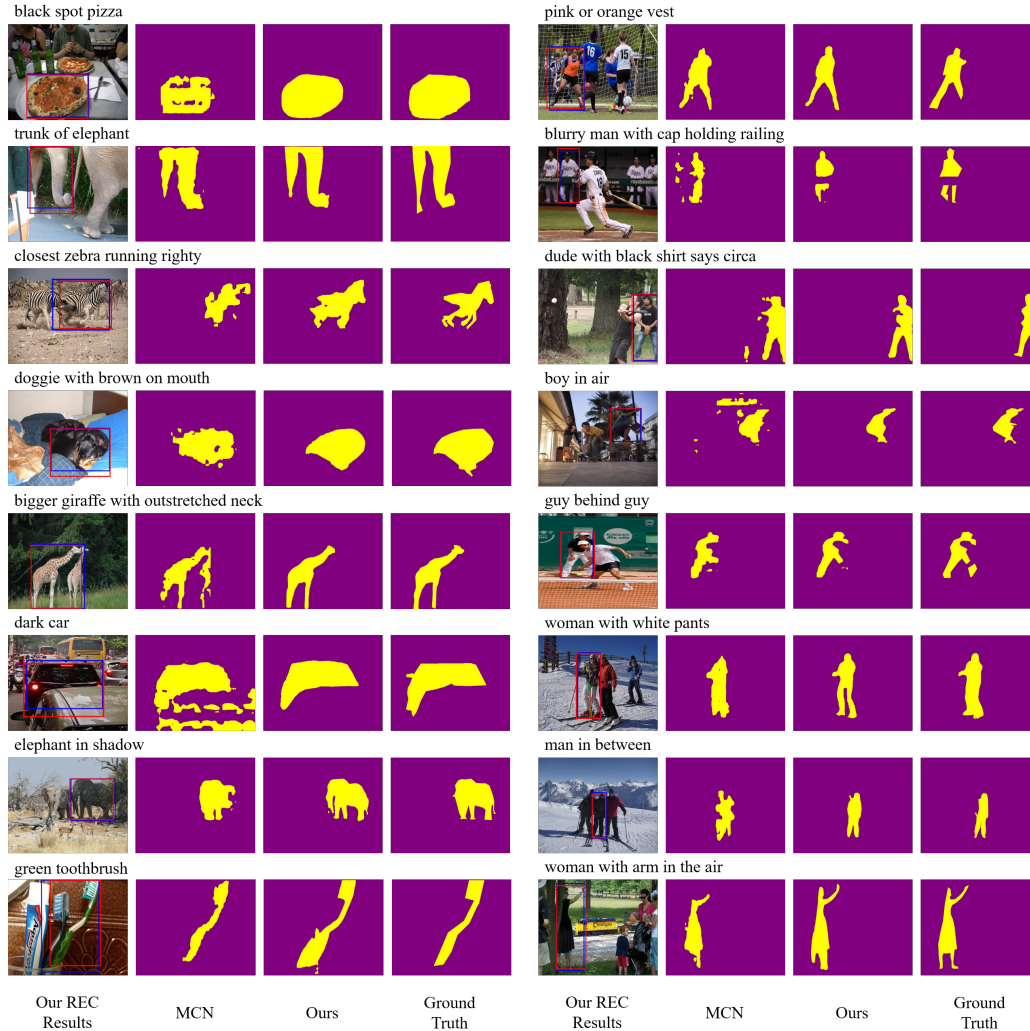

Figure 3: **Additional Results on RES Task.** Images come from RefCOCO+ testA and testB splits.

Table 2: Results on REC and RES tasks with RoBERTa.

| REC             | RefCOCO                             | RefCOCO+                            | RefCOCog             | Flickr30k    |
|-----------------|-------------------------------------|-------------------------------------|----------------------|--------------|
|                 | val / testA / testB                 | val / testA / testB                 | val / test           | test         |
| RefTR           | <b>81.82 / 85.33</b> / 76.31        | 71.13 / 75.58 / 61.91               | 69.32 / 69.10        | 78.13        |
| RefTR + RoBERTa | 81.52 / 85.01 / <b>76.90</b>        | <b>71.41 / 76.82 / 61.95</b>        | <b>69.40 / 69.78</b> | <b>78.56</b> |
| RES             | RefCOCO                             | RefCOCO+                            | RefCOCog             | -            |
|                 | val / testA / testB                 | val / testA / testB                 | val / test           | -            |
| RefTR           | <b>69.94 / 72.80</b> / 66.13        | <b>60.90</b> / 65.20 / <b>53.45</b> | 57.69 / 58.37        | -            |
| RefTR + RoBERTa | 69.76 / <b>72.80</b> / <b>66.63</b> | 60.10 / <b>65.26</b> / 52.57        | <b>58.01 / 58.84</b> | -            |

## 4 Asset License

For the assets that are used: 1. Huggingface uses a Apache License<sup>1</sup>. 2. RefCOCO(+g) and ReferItGame also use a Apache License<sup>2</sup>. 3. Flickr30k Entities dataset use a license granted by Flickr term of use<sup>3</sup>. 4. Visual Genome use a Creative Commons Attribution 4.0 International License<sup>4</sup>.

<sup>1</sup><https://github.com/huggingface/transformers/blob/master/LICENSE>

<sup>2</sup><https://github.com/lichengunc/refer/blob/master/LICENSE>

<sup>3</sup><https://www.flickr.com/help/terms/>

<sup>4</sup><https://visualgenome.org/about>

## References

- [1] N. Carion, F. Massa, G. Synnaeve, N. Usunier, A. Kirillov, and S. Zagoruyko. End-to-end object detection with transformers. In *European Conference on Computer Vision (ECCV)*, pages 213–229, 2020.
- [2] J. Devlin, M.-W. Chang, K. Lee, and K. Toutanova. Bert: Pre-training of deep bidirectional transformers for language understanding. In *Proceedings of the 2019 Conference of the North American Chapter of the Association for Computational Linguistics: Human Language Technologies, Volume 1 (Long and Short Papers)*, pages 4171–4186, 2019.
- [3] K. He, G. Gkioxari, P. Dollár, and R. Girshick. Mask r-cnn. In *Proceedings of the IEEE/CVF International Conference on Computer Vision (ICCV)*, pages 2961–2969, 2017.
- [4] A. Kamath, M. Singh, Y. LeCun, I. Misra, G. Synnaeve, and N. Carion. MDETR—modulated detection for end-to-end multi-modal understanding. *arXiv preprint arXiv:2104.12763*, 2021.
- [5] S. Kazemzadeh, V. Ordonez, M. Matten, and T. Berg. Referitgame: Referring to objects in photographs of natural scenes. In *Proceedings of the Conference on Empirical Methods in Natural Language Processing (EMNLP)*, pages 787–798, 2014.
- [6] R. Krishna, Y. Zhu, O. Groth, J. Johnson, K. Hata, J. Kravitz, S. Chen, Y. Kalantidis, L.-J. Li, D. A. Shamma, et al. Visual genome: Connecting language and vision using crowdsourced dense image annotations. *International Journal of Computer Vision (IJCV)*, 123(1):32–73, 2017.
- [7] Y. Liu, M. Ott, N. Goyal, J. Du, M. Joshi, D. Chen, O. Levy, M. Lewis, L. Zettlemoyer, and V. Stoyanov. Roberta: A robustly optimized bert pretraining approach. *arXiv preprint arXiv:1907.11692*, 2019.
- [8] G. Luo, Y. Zhou, X. Sun, L. Cao, C. Wu, C. Deng, and R. Ji. Multi-task collaborative network for joint referring expression comprehension and segmentation. In *Proceedings of the IEEE Conference on Computer Vision and Pattern Recognition (CVPR)*, 2020.
- [9] V. K. Nagaraja, V. I. Morariu, and L. S. Davis. Modeling context between objects for referring expression understanding. In *European Conference on Computer Vision (ECCV)*, pages 792–807, 2016.
- [10] B. A. Plummer, L. Wang, C. M. Cervantes, J. C. Caicedo, J. Hockenmaier, and S. Lazebnik. Flickr30k entities: Collecting region-to-phrase correspondences for richer image-to-sentence models. In *Proceedings of the IEEE/CVF International Conference on Computer Vision (ICCV)*, pages 2641–2649, 2015.
- [11] L. Yu, P. Poirson, S. Yang, A. C. Berg, and T. L. Berg. Modeling context in referring expressions. In *European Conference on Computer Vision (ECCV)*, pages 69–85, 2016.
